# Supplementary material for: Investigation on Dietary Behavior Changes&nbsp;in 658 Pregnant&nbsp;Women&nbsp;Before and During Pregnancy&nbsp;in China
Source: Research Square preprint supplement (doi:10.21203/rs.3.rs-113988/v1), 2020-12-03
Supplement: Supplementary file 1 [file 3e7699121c42eb8786b051d6.docx]

**Investigation on dietary behavior changes in 658** **pregnant women before and during pregnancy in China**

QingWen Wang1, XiaoQi Cao1, MiaoTian1, ZhiHong Li2, CaiXia Guo2, XinYu, Cao1, YiChuan Zhang1, Wenlin Bai1, Li Wang1*

1. Department of Child and Adolescent Health, School of Public Health, Shanxi Medical University. TaiYuan, Shan Xi, China.

2. Department of Obstetrics and Gynecology, Taihang Hospital, TaiYuan, Shan Xi, China.

*Correspondence to wangli_1@sxmu.edu.cn

**Questionnaire on the Lifestyle of Pregnant Women in Taiyuan**

**No**：

Dear Mother-to-be,

We all know that a healthy diet during pregnancy is the foundation for a healthy baby. According to this survey, we want to provide more detailed eating information for pregnant women. Please fill in the form according to your actual situation and mark "√" on the option that matches your actual situation. Thank you for your support and cooperation.

Your name Tel ;

Your husband’s name Tel

**Ⅰ. General situation**

**1**. Age

**2.** Educational experience

①Junior high school degree or below

②Senior high and technical secondary

③Junior college

④Bachelor degree or above

**3.** Weight before pregnancy ____ kg Height ____ m

**Ⅱ. History of pregnancy**

**1**. Parity

**2.** Times of abortion

**Ⅲ. Dietary habits**

**1.** Did your eating habits have any changes since pregnant?

①No ②Yes

**2.** If yes, please explain what changes have occurredbriefly

**3**. Frequency of meals per day pre-pregnancy

**4.** Frequency of meals per day in pregnancy

**5.** Number of days eating at home per week

**6**. Your preference for these tastes is often：

**A1**.Salty pre-pregnancy：① Very strong ② Strong ③ Medium ④ Light

**A2**.Spicy pre-pregnancy: ① Very strong ② Strong ③ Medium ④ Light

**A3**.Sweet pre-pregnancy: ① Very strong ② Strong ③ Medium ④ Light

**B1**.Salty in pregnancy: ① Very strong ② Strong ③ Medium ④ Light

**B2**.Spicy in pregnancy: ① Very strong ② Strong ③ Medium ④ Light

**B3**.Sweet in pregnancy: ① Very strong ② Strong ③ Medium ④ Light

**7.** Choose the two most common cooking methods in your daily life.

Pre-pregnancy: ① Frying ② Braising ③ Sautéing ④ Steaming ⑤ Stewing

In pregnancy: ① Frying ② Braising ③ Sautéing ④ Steaming ⑤ Stewing

Department of Child and Adolescent Health, School of Public Health, Shanxi Medical University

Department of Obstetrics and Gynecology, Taihang Hospital
